# Supplementary material for: Switchable synthesis of p- and n-type Cu–In–S grooved pyramid-like microcrystals for unassisted photoelectrochemical water splitting
Source: Royal Society of Chemistry journal article supplement (doi:10.1039/c8ta02386g), 2018-01-01
Supplement: c8ta02386g1.pdf [file c8ta02386g1.pdf]

## Electronic supplementary information

### Switchable synthesis of p- and n-type Cu-In-S grooved pyramid-like microcrystals for unassisted photoelectrochemical water splitting

Xiaoyang Feng, Rui Li, Menglong Wang, Yubin Chen\*

*International Research Center for Renewable Energy, State Key Laboratory of  
Multiphase Flow in Power Engineering, Xi'an Jiaotong University, Shaanxi 710049,  
P. R. China.*

Corresponding author information:

E-mail: ybchen@mail.xjtu.edu.cn

**Table S1** SEM-EDX results of the Cu-In-S films prepared with different amount of thiourea.

| Sample  | Cu element | In element | S element |
|---------|------------|------------|-----------|
| Cu15S0  | 58.10%     | 8.07%      | 33.83%    |
| Cu15S10 | 21.31%     | 24.99%     | 53.70%    |
| Cu15S15 | 17.48%     | 27.17%     | 55.35%    |
| Cu15S30 | 8.70%      | 34.87%     | 56.43%    |
| Cu15S45 | 16.61%     | 27.82%     | 55.57%    |

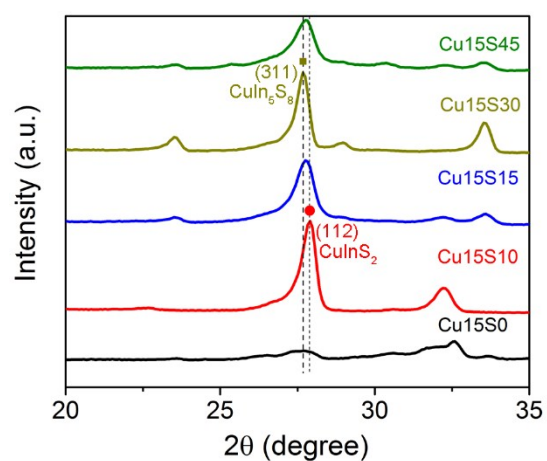

**Fig. S1** The magnified XRD patterns of as-prepared samples.

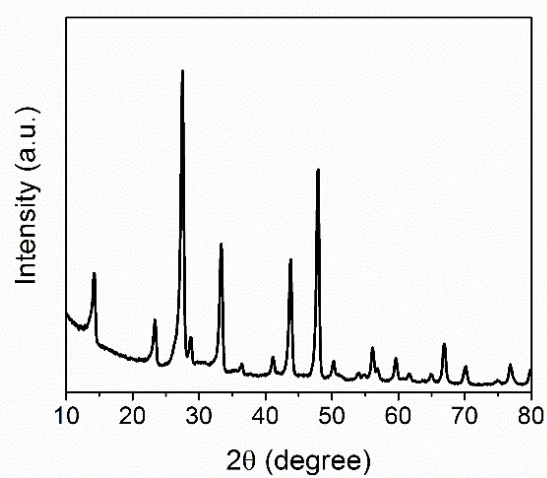

**Fig. S2** XRD pattern of  $\text{In}_2\text{S}_3$  film.

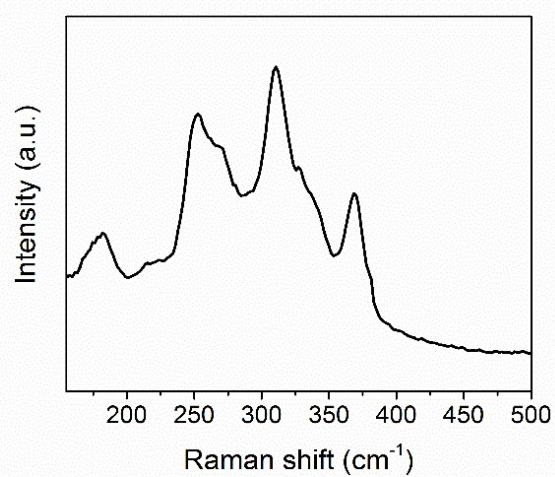

**Fig. S3** Raman spectrum of  $\text{In}_2\text{S}_3$  film.

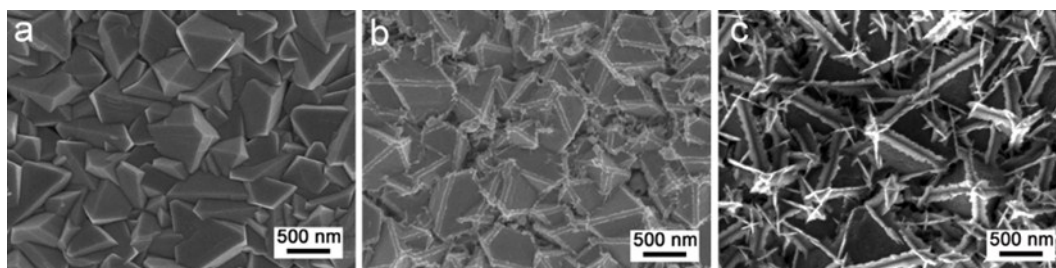

**Fig. S4** Top-view SEM images of (a)  $\text{In}_2\text{S}_3$  film; (b)  $\text{Cu}_{15}\text{S}_{10}$  sample solvothermally treated for 3 h; and (c)  $\text{Cu}_{15}\text{S}_{10}$  sample solvothermally treated for 12 h.

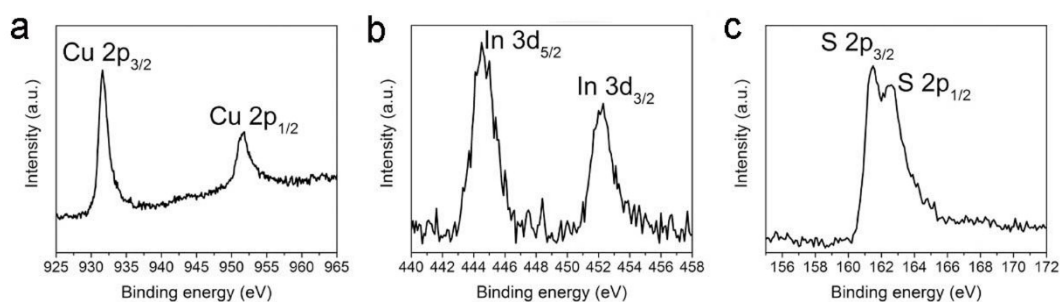

**Fig. S5** XPS spectra of powder extracted from the solution after the solvothermal reaction for preparing  $\text{Cu}_{15}\text{S}_{10}$  sample.

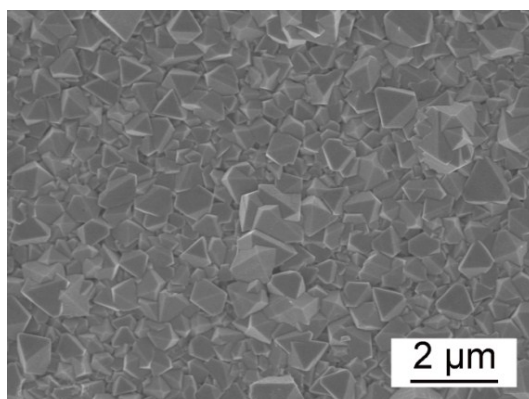

**Fig. S6** Top-view SEM images of  $\text{Cu}_0\text{S}_{10}$  film prepared without adding copper source.

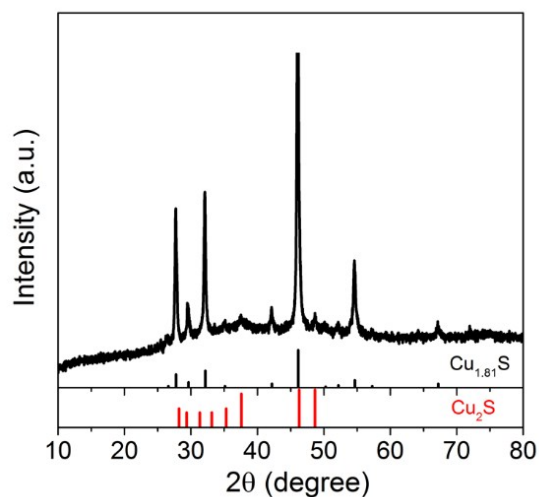

**Fig. S7** XRD patterns of powder extracted from the solution after the solvothermal reaction for preparing Cu15S10 sample.

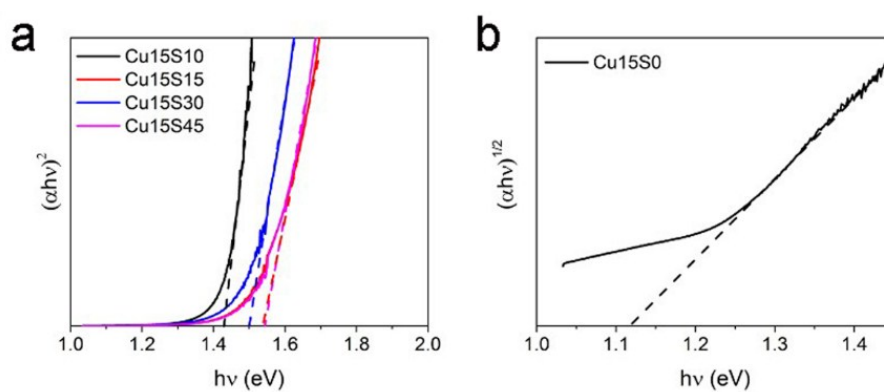

**Fig. S8** (a, b) plots of  $(\alpha h\nu)^n$  vs  $h\nu$  of Cu-In-S films prepared with different amount of thiourea.

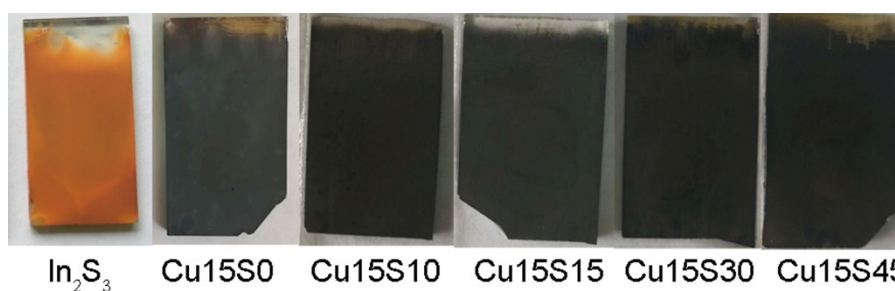

**Fig. S9** Photograph of  $\text{In}_2\text{S}_3$  film and Cu-In-S films prepared with different amounts of thiourea.

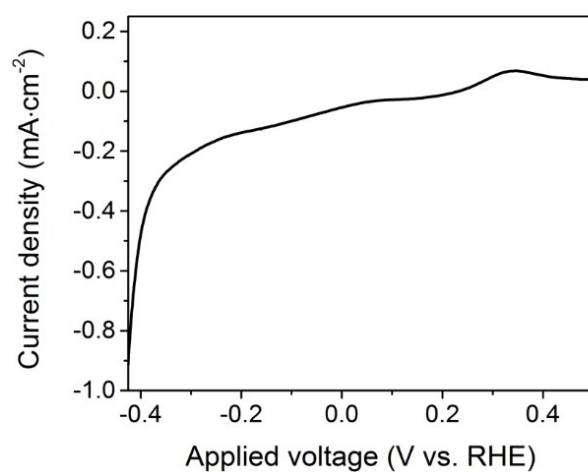

**Fig. S10** Linear sweep voltammetry of CuInS<sub>2</sub> film was measured at 0.1 M Na<sub>2</sub>SO<sub>4</sub> (pH adjusted to 3 by H<sub>2</sub>SO<sub>4</sub>) under chopped irradiation light.

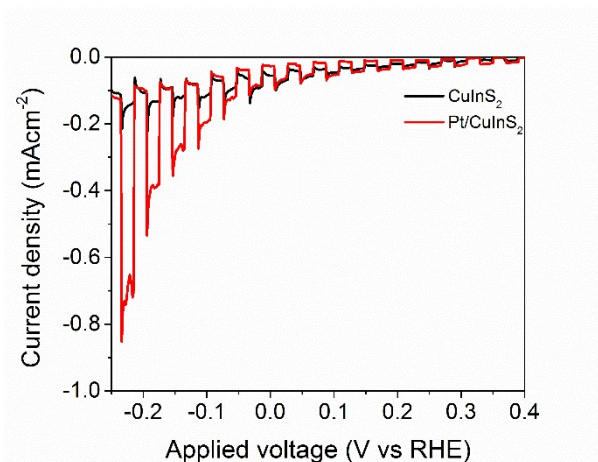

**Fig. S11** Current-potential curves of CuInS<sub>2</sub> and Pt/CuInS<sub>2</sub>.

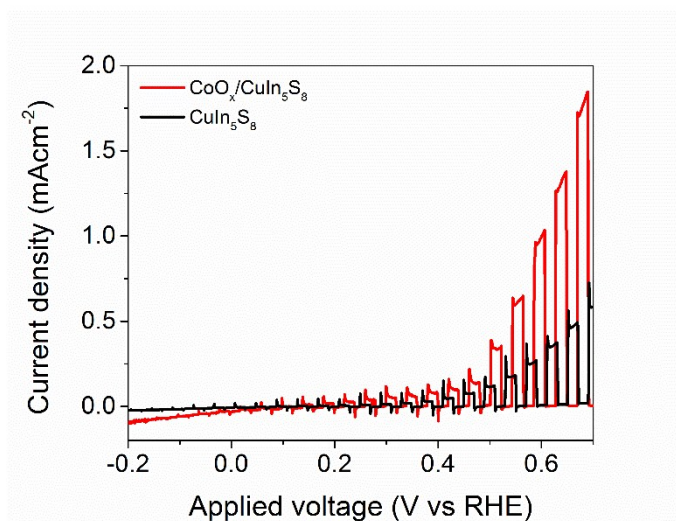

**Fig. S12** Current-potential curves of CuIn<sub>5</sub>S<sub>8</sub> and CoO<sub>x</sub>/CuIn<sub>5</sub>S<sub>8</sub>.

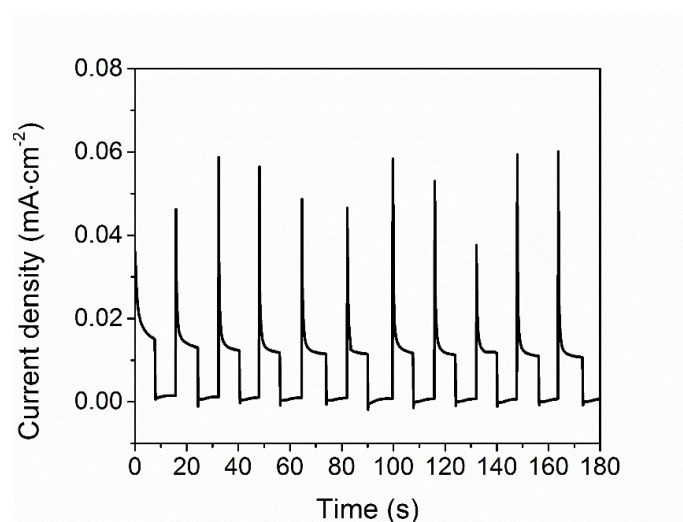

**Fig. S13** Current-time curve for the tandem PEC cell using CoO<sub>x</sub>/CuIn<sub>5</sub>S<sub>8</sub> photoanode and Pt/CuInS<sub>2</sub> photocathode under light-chopping conditions. The electrolyte is 0.1 M Na<sub>2</sub>SO<sub>4</sub> aqueous solution (pH adjusted to 3 by H<sub>2</sub>SO<sub>4</sub>).
